# Supplementary material for: Mitochondrial and Y-chromosome diversity of the Tharus (Nepal): a reservoir of genetic variation
Source: Springer Nature journal article supplement (doi:10.1186/1471-2148-9-154), 2009-07-02
Supplement: 12862_2008_1068_MOESM6_ESM.pdf [file 12862_2008_1068_MOESM6_ESM.pdf]

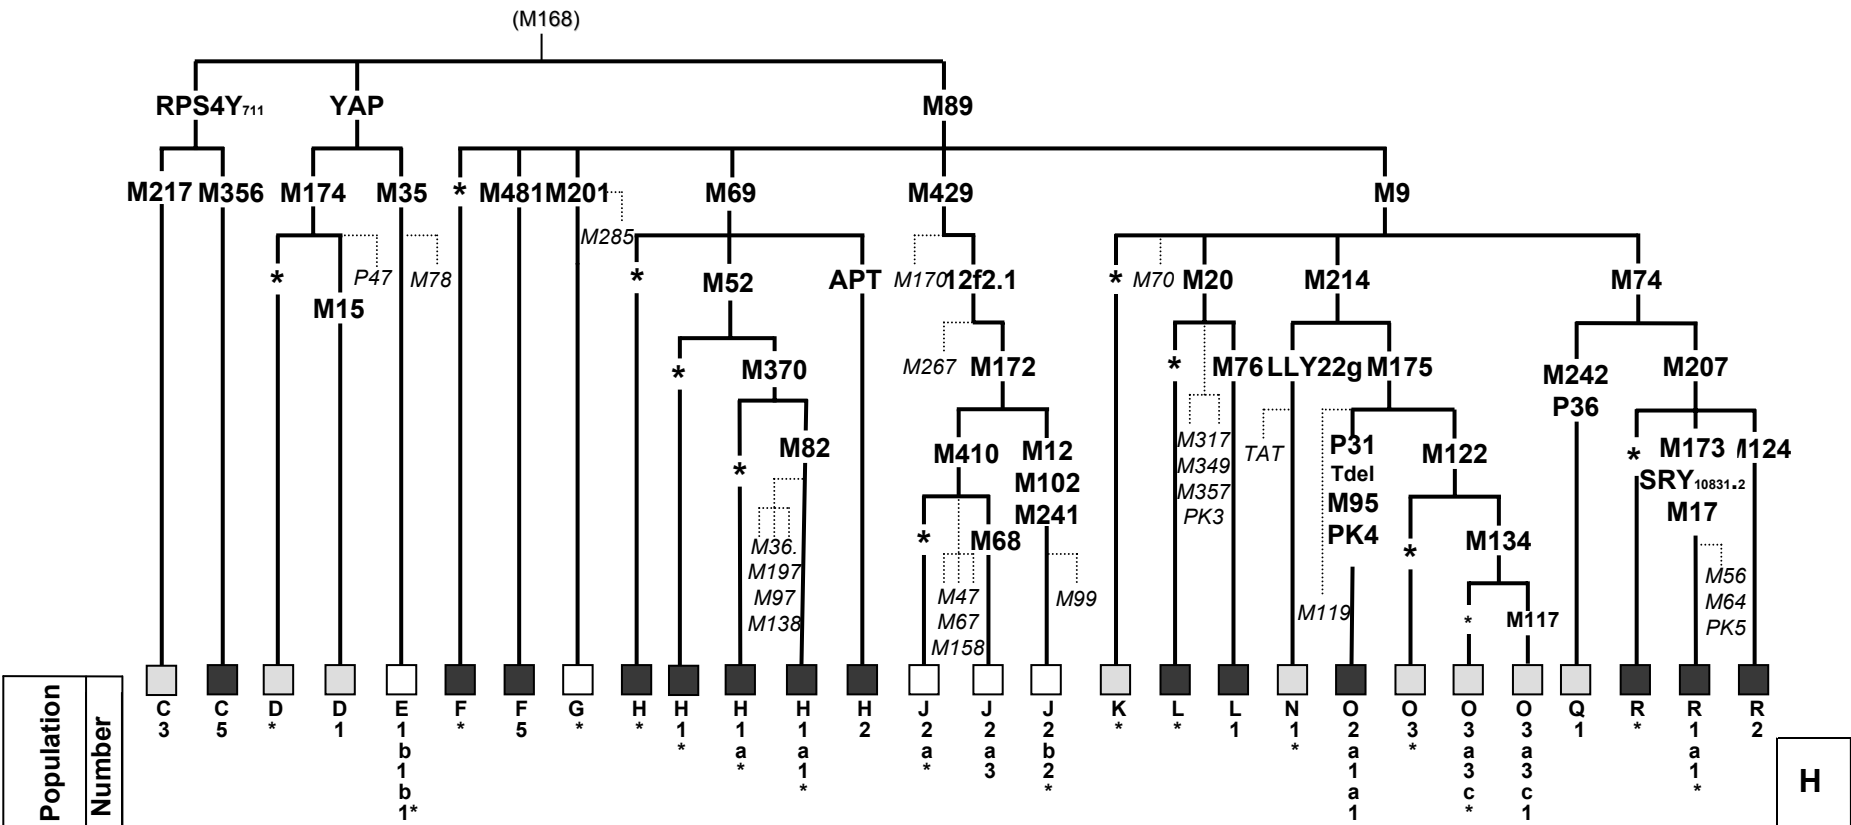

| Population | Number | Haplogroups |        |        |        |                             |        |        |        |        |             |                  |                       |        |                  |                  |                       |        |        |        | H   |             |                            |             |                            |                            |        |        |                       |        |       |
|------------|--------|-------------|--------|--------|--------|-----------------------------|--------|--------|--------|--------|-------------|------------------|-----------------------|--------|------------------|------------------|-----------------------|--------|--------|--------|-----|-------------|----------------------------|-------------|----------------------------|----------------------------|--------|--------|-----------------------|--------|-------|
|            |        | C<br>3      | C<br>5 | D<br>* | D<br>1 | E<br>1<br>b<br>1<br>b<br>1* | F<br>* | F<br>5 | G<br>* | H<br>* | H<br>1<br>* | H<br>1<br>a<br>* | H<br>1<br>a<br>1<br>* | H<br>2 | J<br>2<br>a<br>* | J<br>2<br>a<br>3 | J<br>2<br>b<br>2<br>* | K<br>* | L<br>* | L<br>1 |     | N<br>1<br>* | O<br>2<br>a<br>1<br>a<br>1 | O<br>3<br>* | O<br>3<br>a<br>3<br>c<br>* | O<br>3<br>a<br>3<br>c<br>1 | Q<br>1 | R<br>* | R<br>1<br>a<br>1<br>* | R<br>2 |       |
| Th-C I     | 57     |             |        |        | 3.5    |                             |        |        |        | 8.8    |             |                  | 7.0                   |        | 10.5             |                  | 1.8                   |        |        |        | 3.5 |             |                            |             | 3.5                        | 49.1                       |        |        | 10.5                  | 1.8    | 0.733 |
| Th-C II    | 77     |             | 1.3    | 5.2    |        |                             |        |        |        | 9.1    |             |                  | 18.2                  | 11.7   | 7.8              |                  | 3.9                   |        |        |        |     |             |                            |             | 28.6                       | 2.6                        |        | 3.9    | 7.8                   | 0.855  |       |
| Th-E       | 37     |             |        |        |        | 8.1                         |        |        |        | 8.1    |             |                  | 5.4                   |        | 13.5             |                  | 8.1                   | 2.7    |        |        | 5.4 |             | 10.8                       |             | 18.9                       |                            |        | 16.2   | 2.7                   | 0.906  |       |
| H-Te       | 26     | 3.8         | 7.7    |        |        |                             |        |        |        |        |             |                  | 3.8                   |        |                  |                  | 3.8                   |        |        |        | 3.8 |             |                            | 3.8         |                            |                            |        | 69.2   | 3.8                   | 0.527  |       |
| H-ND       | 49     |             |        |        |        |                             |        | 2.0    |        | 2.0    | 6.1         | 10.2             |                       | 2.0    | 2.0              | 4.1              |                       | 4.1    |        | 2.0    |     | 2.0         |                            |             | 6.1                        | 2.0                        | 34.7   | 20.4   | 0.831                 |        |       |
| T-AP       | 29     |             |        |        |        | 6.9                         | 3.4    | 3.4    | 6.9    |        |             | 27.6             |                       |        |                  | 3.4              |                       |        |        | 6.9    |     | 3.4         |                            | 3.4         |                            |                            | 27.6   | 6.9    | 0.852                 |        |       |
