# Supplementary material for: Mitochondrial and Y-chromosome diversity of the Tharus (Nepal): a reservoir of genetic variation
Source: Springer Nature journal article supplement (doi:10.1186/1471-2148-9-154), 2009-07-02
Supplement: 12862_2008_1068_MOESM9_ESM.pdf [file 12862_2008_1068_MOESM9_ESM.pdf]

a)

## mtDNA components

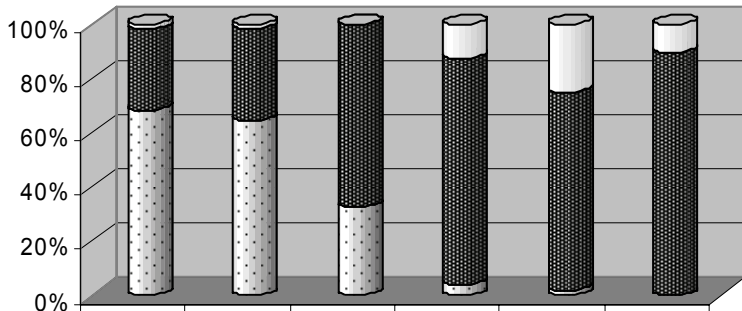

|  | Th-CI<br>(57) | Th-CII<br>(76) | Th-E<br>(40) | H-Te<br>(24) | H-ND<br>(48) | T-AP<br>(29) |
|--|---------------|----------------|--------------|--------------|--------------|--------------|
|--|---------------|----------------|--------------|--------------|--------------|--------------|

|                    |      |      |      |      |      |      |
|--------------------|------|------|------|------|------|------|
| □ West Eurasia (%) | 1.8  | 1.3  | -    | 12.5 | 25.0 | 10.3 |
| ■ Indian area (%)  | 29.8 | 34.2 | 67.5 | 83.3 | 72.9 | 89.7 |
| ▣ East Asia (%)    | 68.4 | 64.5 | 32.5 | 4.2  | 2.1  | -    |

b)

## Y-chromosome components

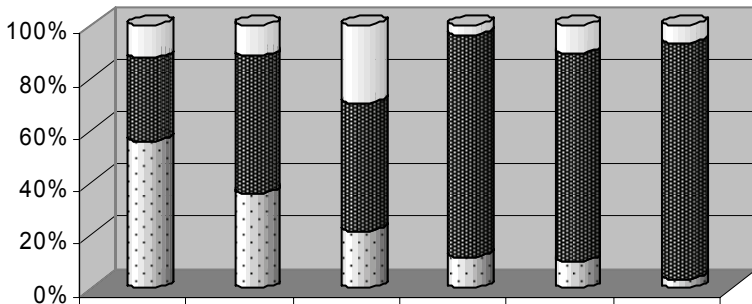

|  | Th-CI<br>(57) | Th-CII<br>(77) | Th-E<br>(37) | H-Te<br>(26) | H-ND<br>(49) | T-AP<br>(29) |
|--|---------------|----------------|--------------|--------------|--------------|--------------|
|--|---------------|----------------|--------------|--------------|--------------|--------------|

|                    |      |      |      |      |      |      |
|--------------------|------|------|------|------|------|------|
| □ West Eurasia (%) | 12.3 | 11.7 | 29.7 | 3.8  | 10.2 | 6.9  |
| ■ Indian area (%)  | 31.6 | 52.0 | 48.6 | 84.6 | 79.6 | 89.7 |
| ▣ East Asia (%)    | 56.1 | 36.4 | 21.6 | 11.5 | 10.2 | 3.4  |
