# Supplementary material for: Mitochondrial and Y-chromosome diversity of the Tharus (Nepal): a reservoir of genetic variation
Source: Springer Nature journal article supplement (doi:10.1186/1471-2148-9-154), 2009-07-02
Supplement: 12862_2008_1068_MOESM12_ESM.pdf [file 12862_2008_1068_MOESM12_ESM.pdf]

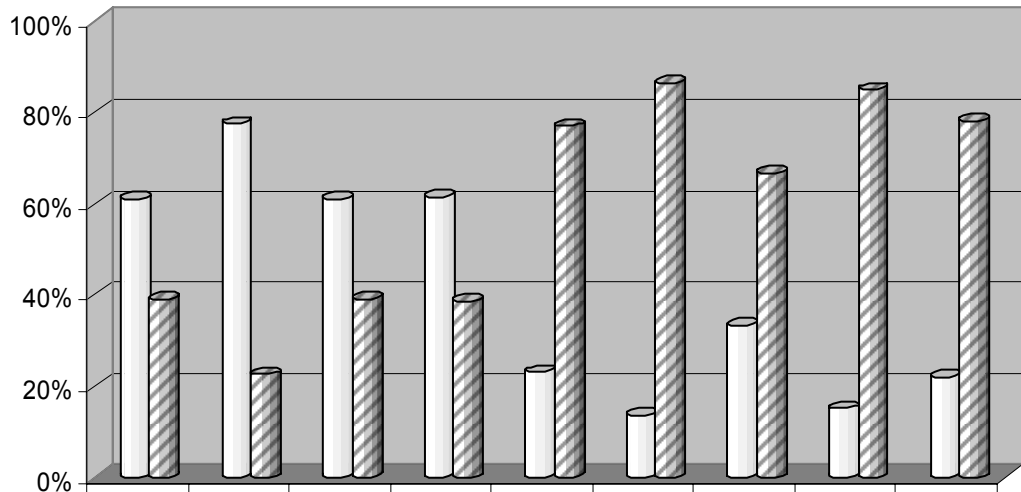

|                             | <b>Th-CI<br/>(18)</b> | <b>Th-CII<br/>(40)</b> | <b>Th-E<br/>(18)</b> | <b>T-AP<br/>(26)</b> | <b>H-ND<br/>(39)</b> | <b>H-Te<br/>(22)</b> | <b>Tama<sup>a</sup><br/>(6)</b> | <b>New<sup>a</sup><br/>(40)</b> | <b>Kata<sup>a</sup><br/>(46)</b> |
|-----------------------------|-----------------------|------------------------|----------------------|----------------------|----------------------|----------------------|---------------------------------|---------------------------------|----------------------------------|
| <b>□ Local (%)</b>          | <b>61.1</b>           | <b>77.5</b>            | <b>61.1</b>          | <b>61.5</b>          | <b>23.0</b>          | <b>13.6</b>          | <b>33.3</b>                     | <b>15.0</b>                     | <b>21.7</b>                      |
| <b>▨ Inter-Regional (%)</b> | <b>38.9</b>           | <b>22.5</b>            | <b>38.9</b>          | <b>38.5</b>          | <b>77.0</b>          | <b>86.4</b>          | <b>66.7</b>                     | <b>85.0</b>                     | <b>78.3</b>                      |
