# Supplementary figures and images for: Mitochondrial and Y-chromosome diversity of the Tharus (Nepal): a reservoir of genetic variation
Source: Springer Nature journal article supplement (doi:10.1186/1471-2148-9-154), 2009-07-02

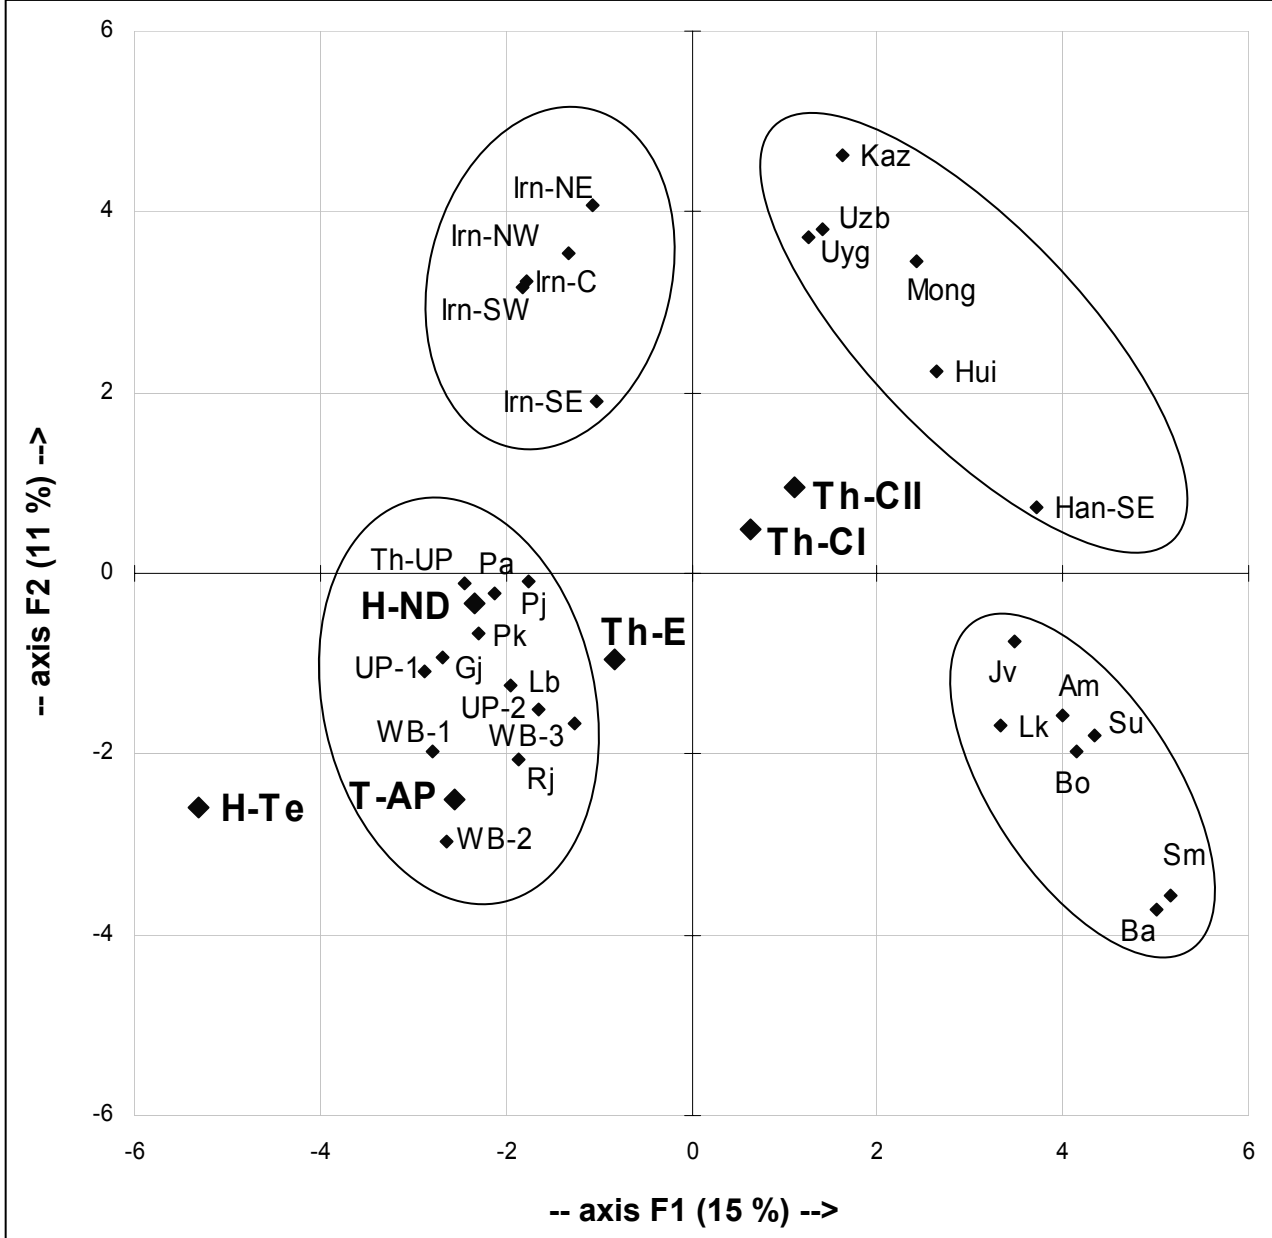

Supplement: 12862_2008_1068_MOESM10_ESM.pdf [file 12862_2008_1068_MOESM10_ESM.pdf]

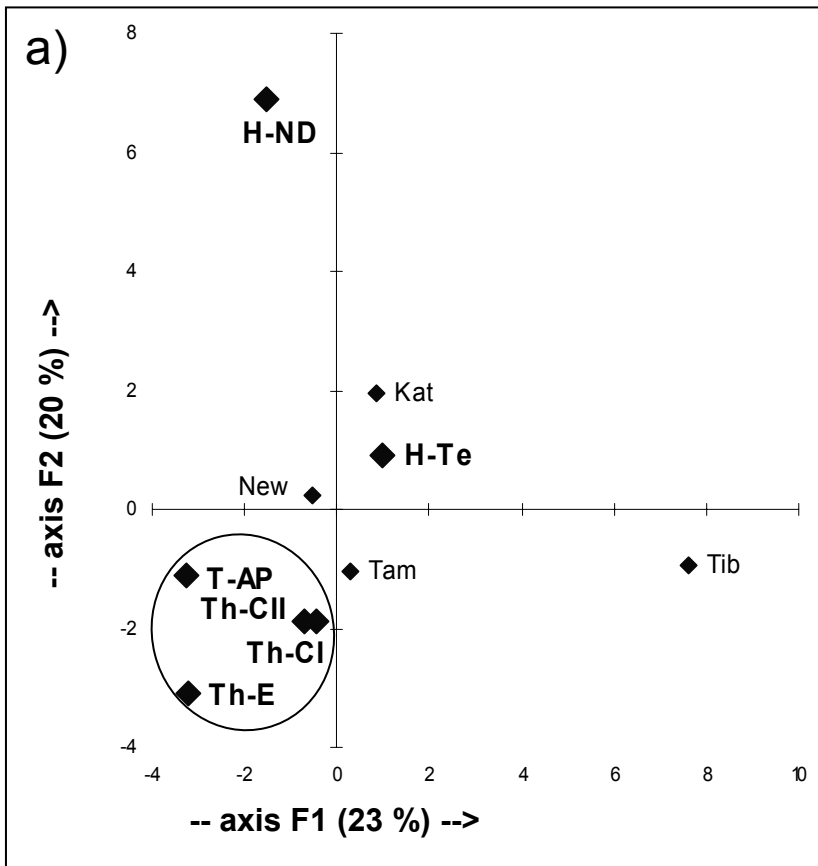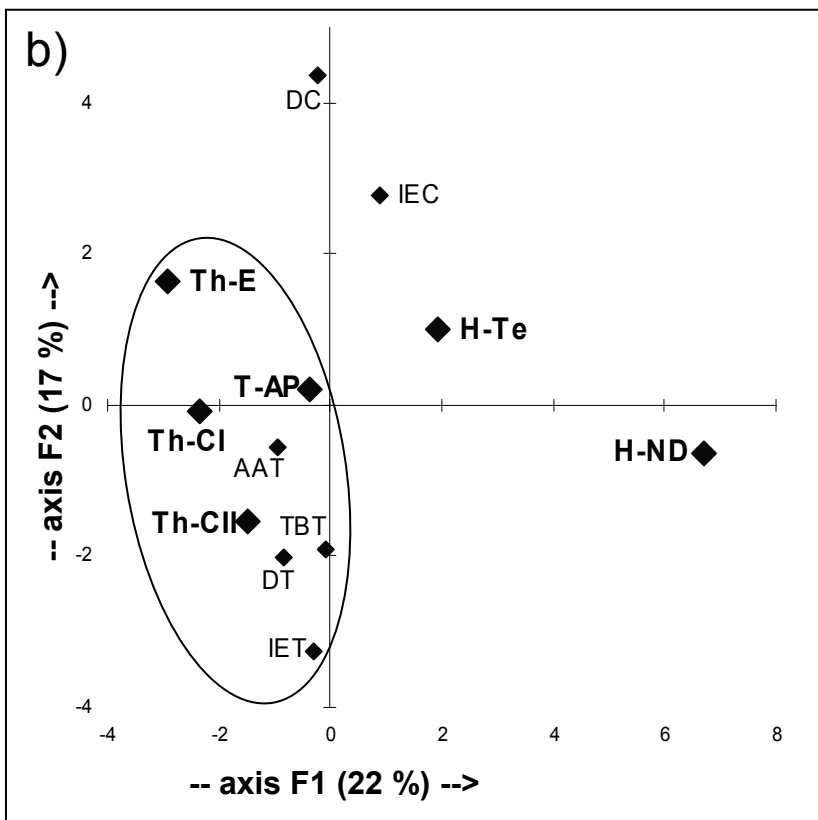

Supplement: 12862_2008_1068_MOESM11_ESM.pdf [file 12862_2008_1068_MOESM11_ESM.pdf]

(b)

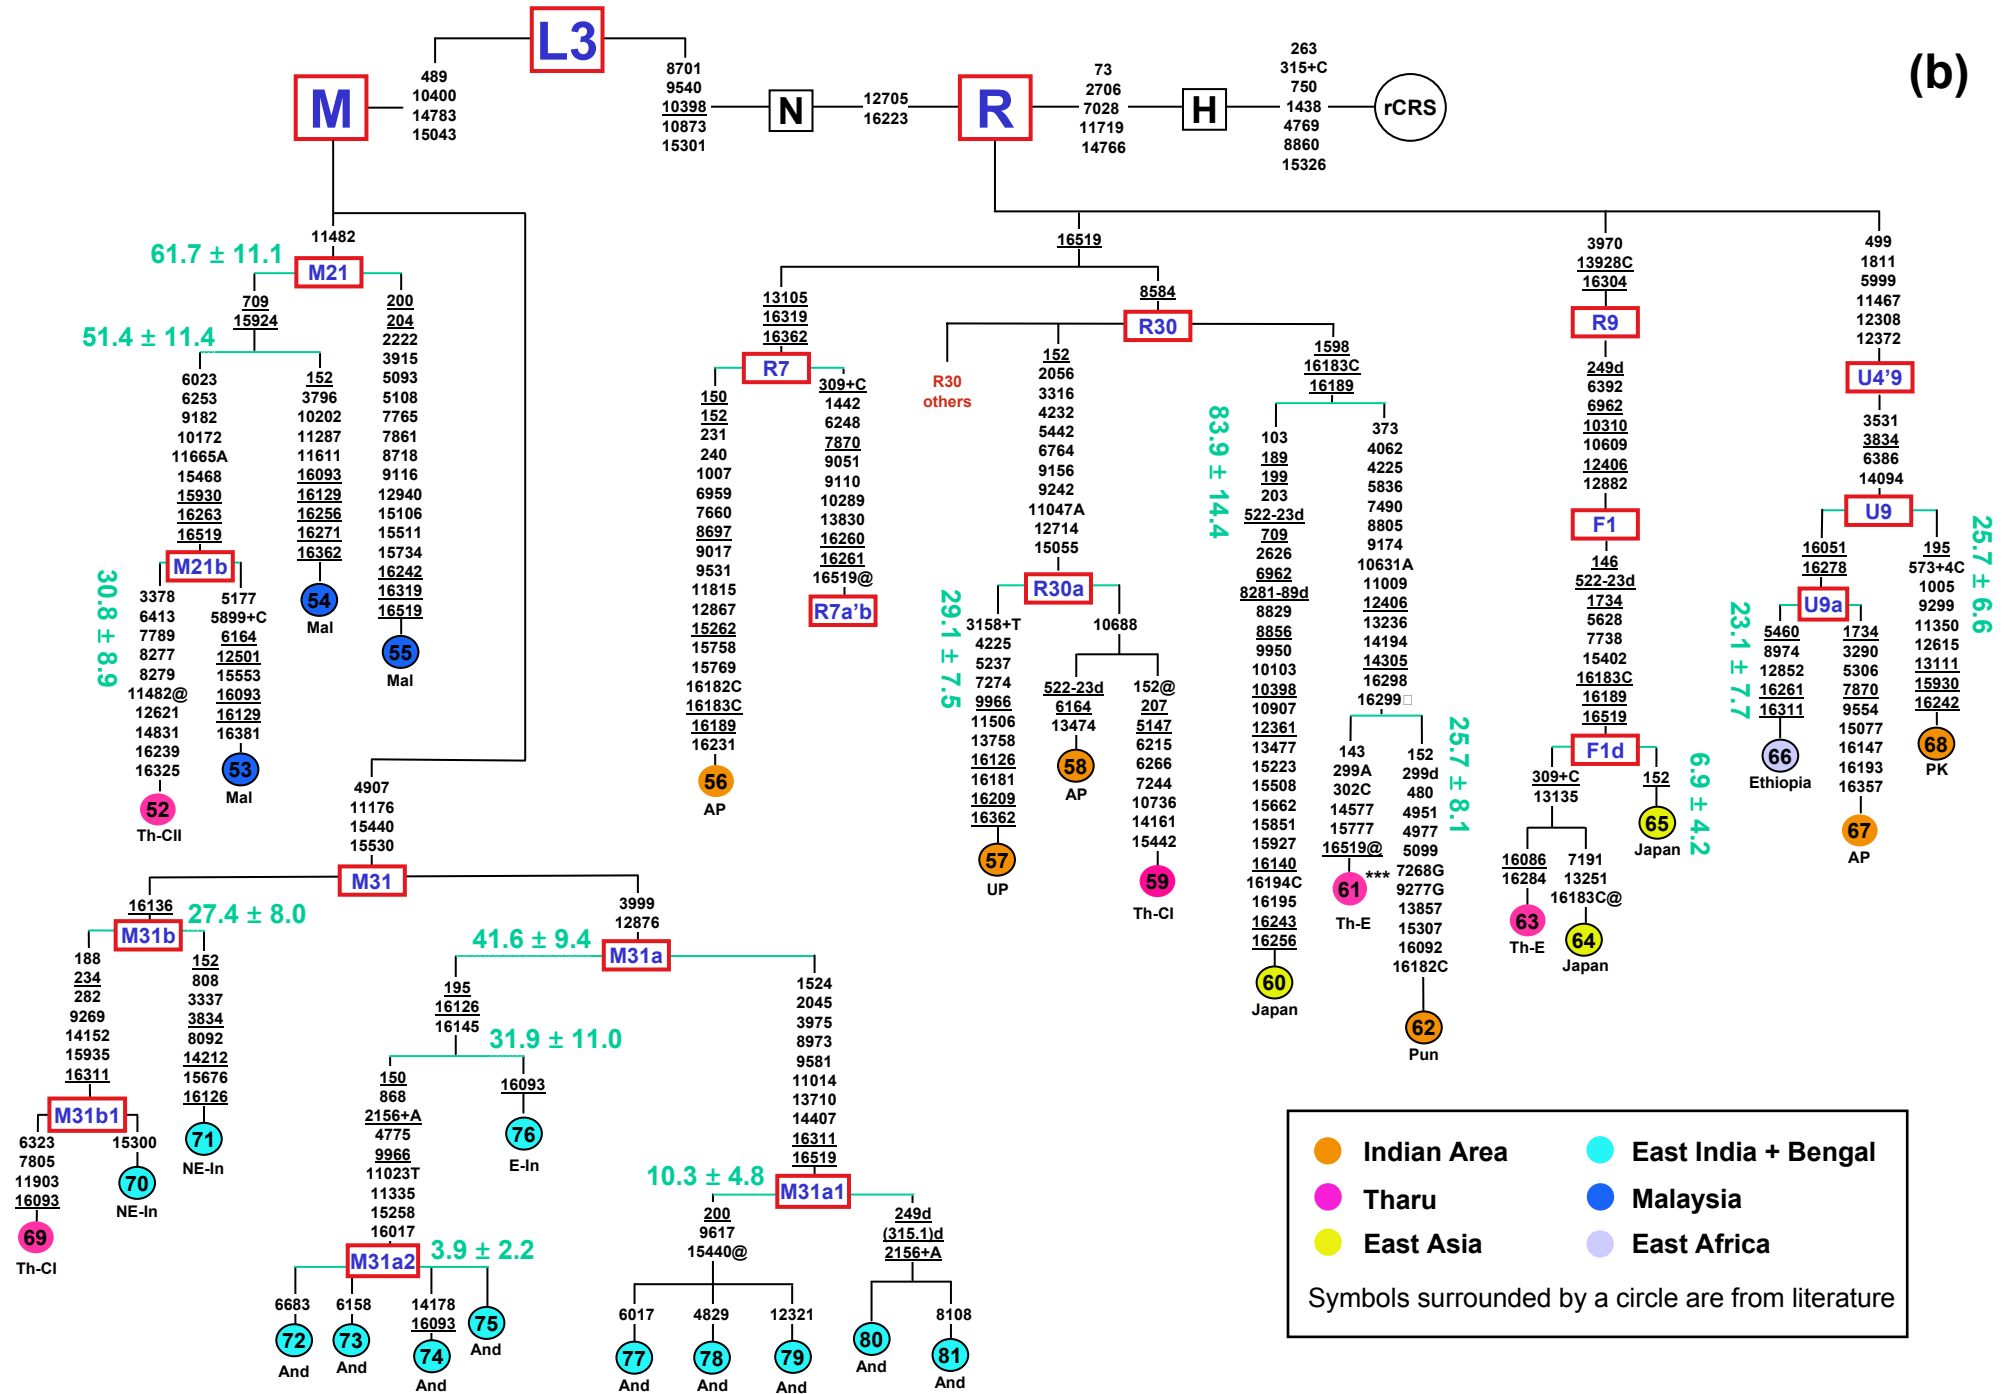

Supplement: 12862_2008_1068_MOESM13_ESM.pdf [file 12862_2008_1068_MOESM13_ESM.pdf]

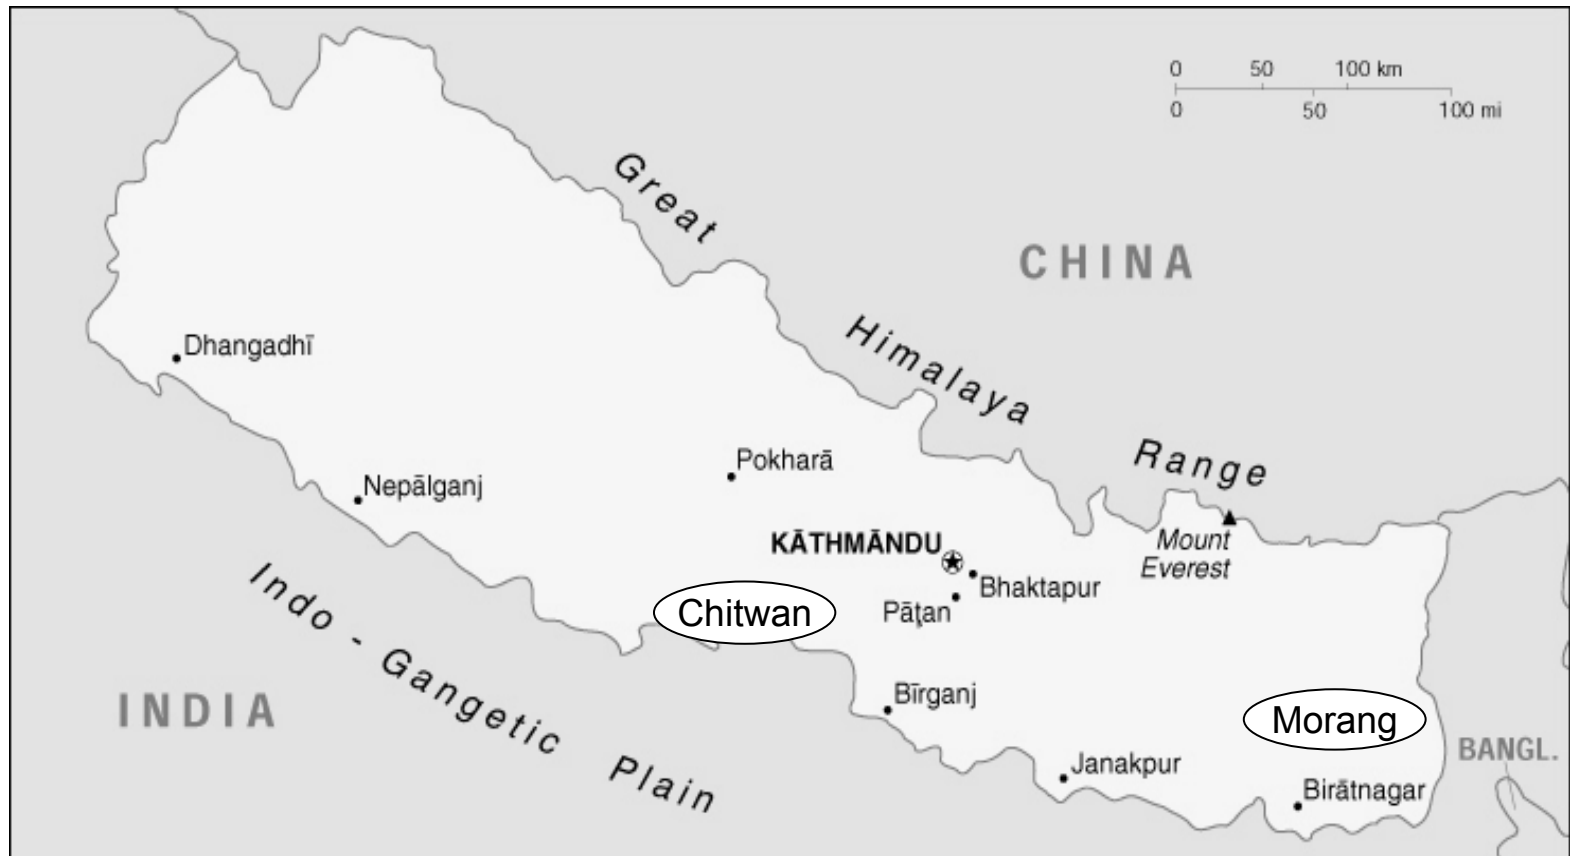

Supplement: 12862_2008_1068_MOESM4_ESM.pdf [file 12862_2008_1068_MOESM4_ESM.pdf]

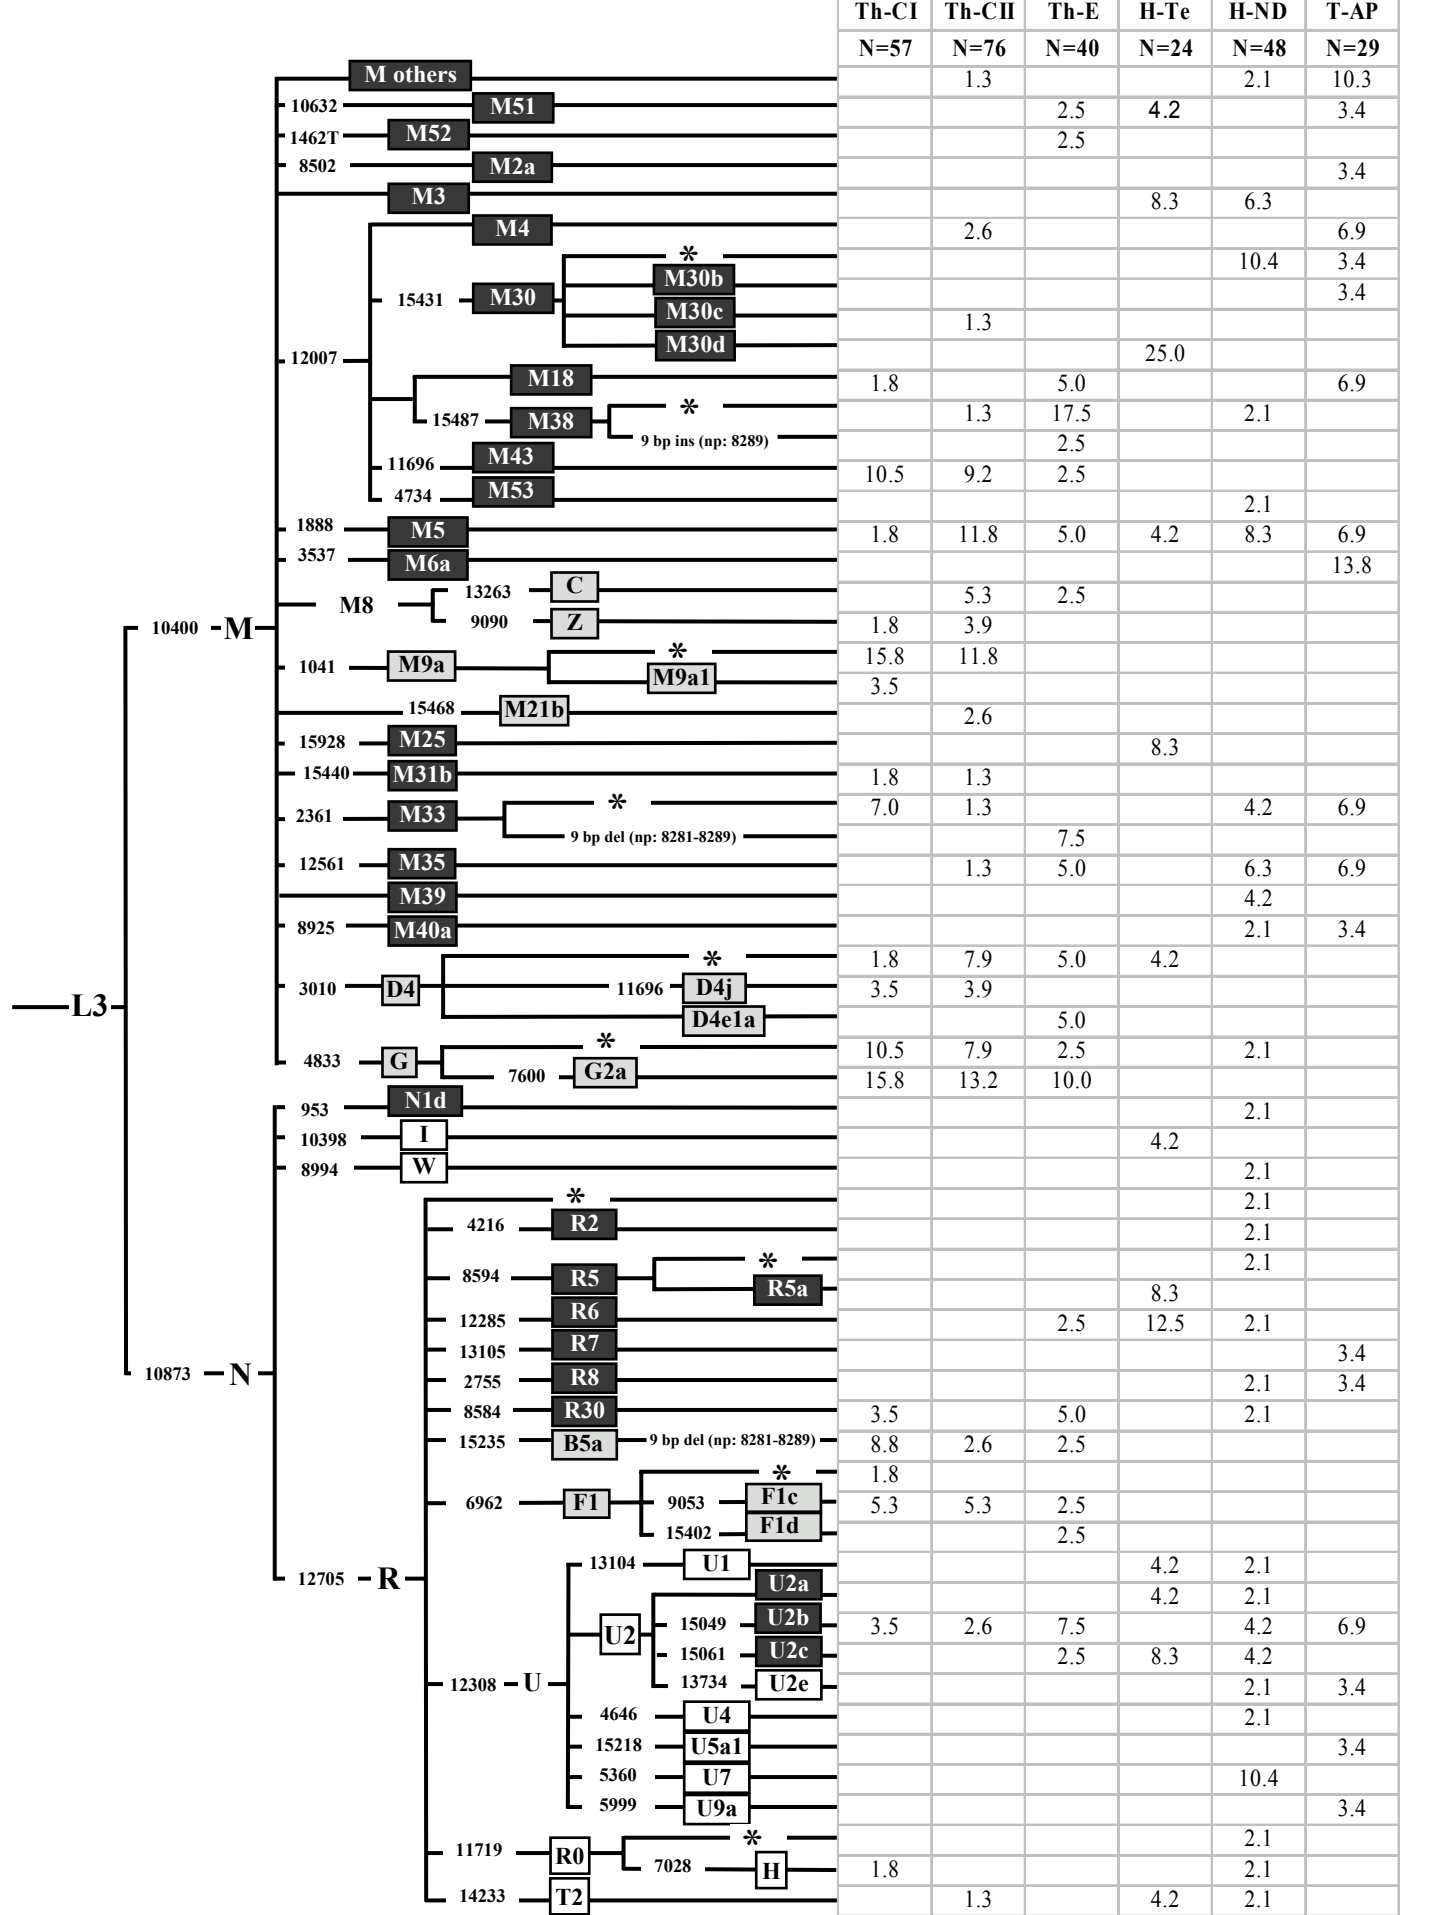

Supplement: 12862_2008_1068_MOESM5_ESM.pdf [file 12862_2008_1068_MOESM5_ESM.pdf]

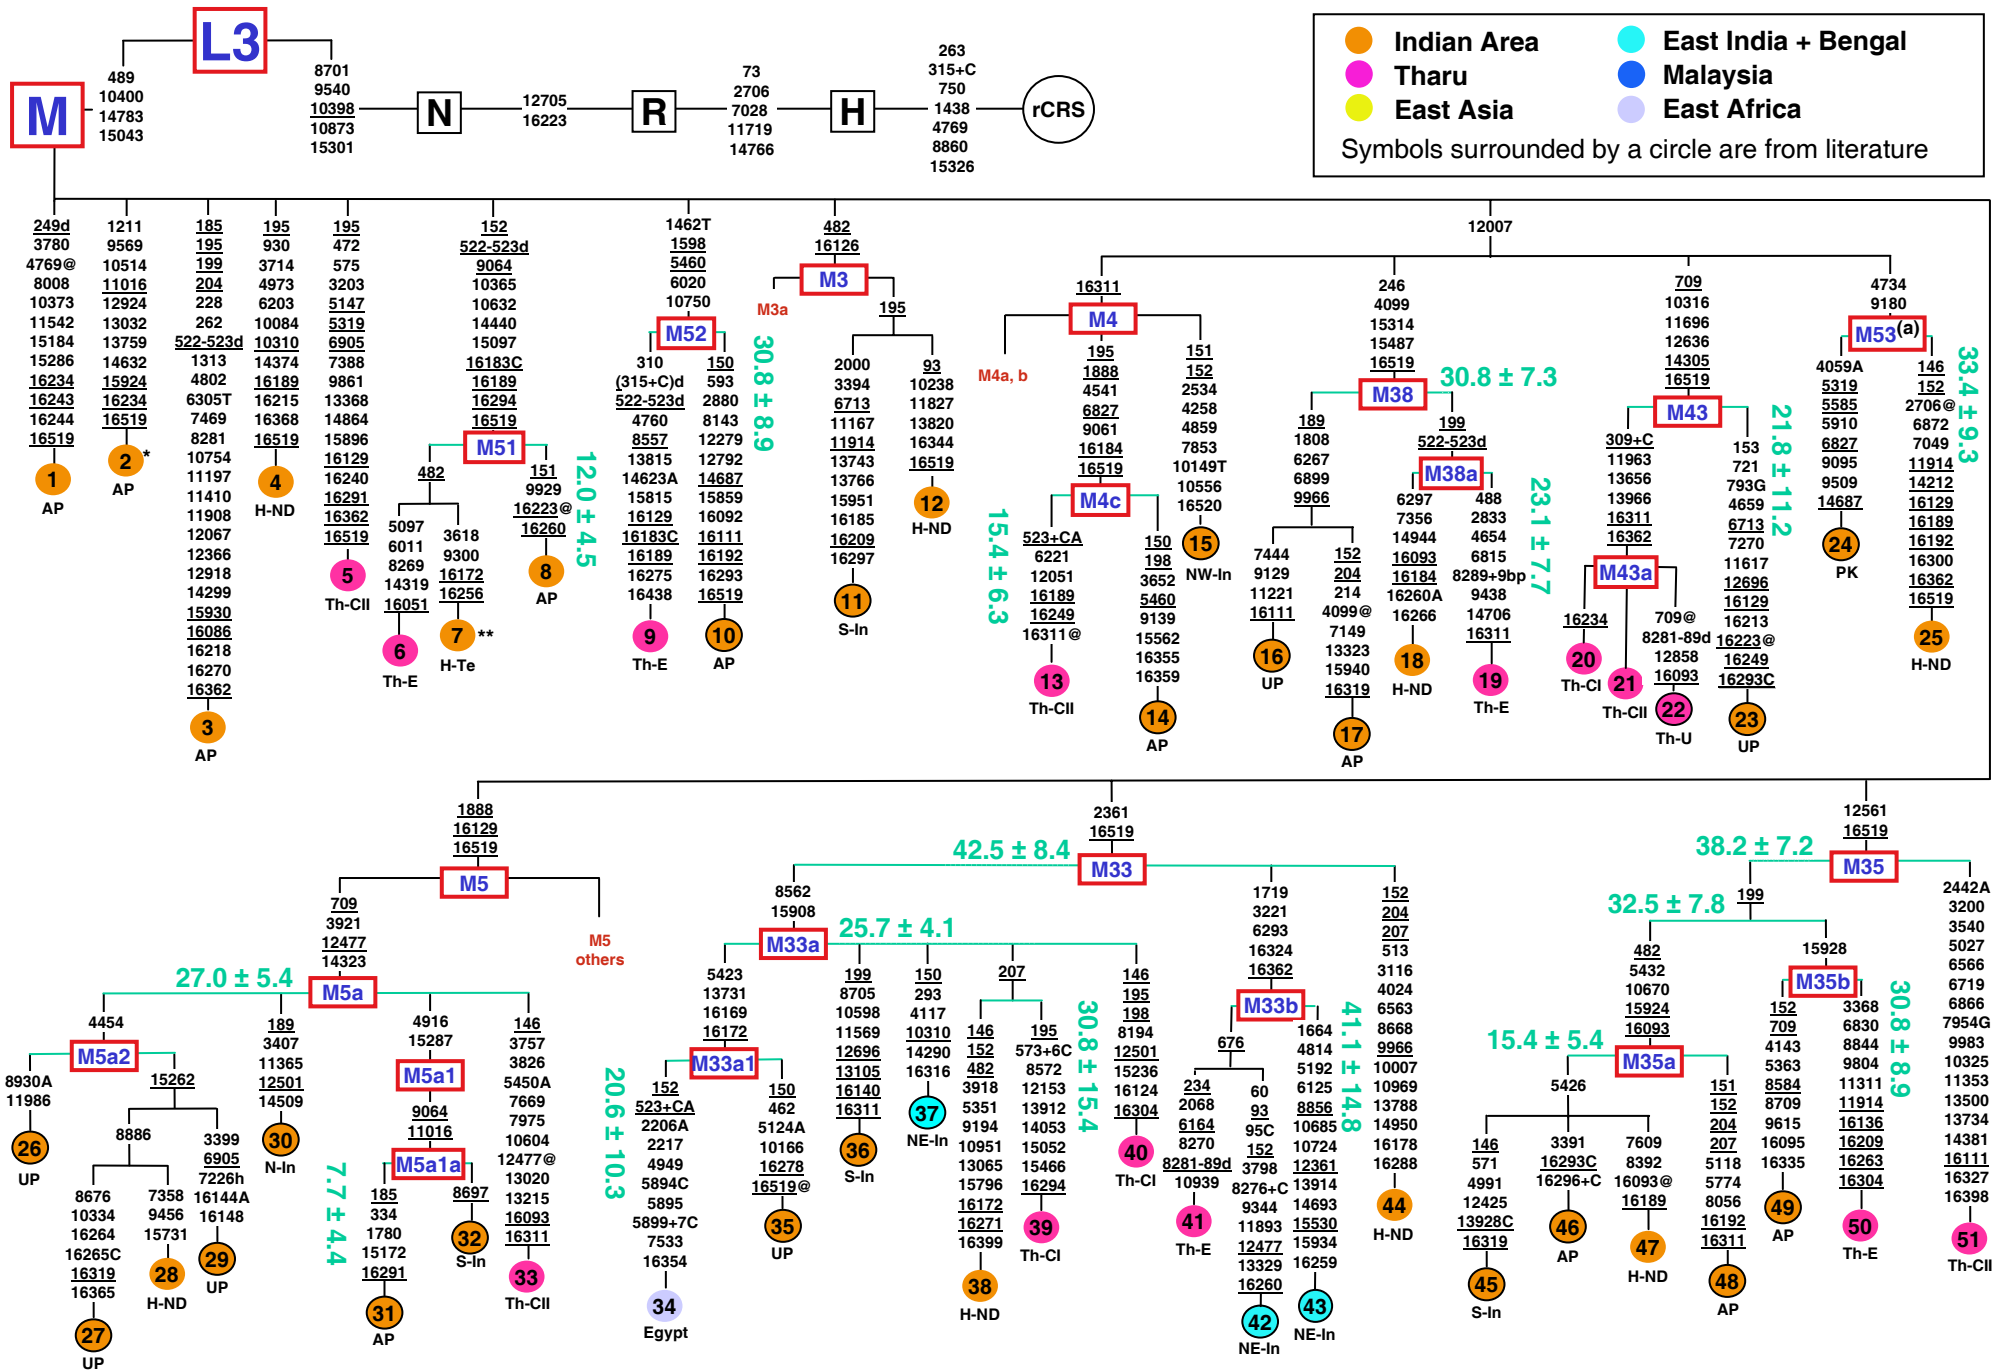

Supplement: 12862_2008_1068_MOESM7_ESM.pdf [file 12862_2008_1068_MOESM7_ESM.pdf]
